# Supplementary material for: The succinoglycan riclin restores beta cell function through the regulation of macrophages on Th1 and Th2 differentiation in type 1 diabetic mice
Source: Royal Society of Chemistry journal article supplement (doi:10.1039/d1fo02315b), 2021-01-01
Supplement: d1fo02315b1.pdf [file d1fo02315b1.pdf]

### **Electronic supplementary information**

Biochemical parameters of STZ-induced diabetic mice treated with riclin (Table S1);

Primer sequences used in quantitative RT-PCR analysis (Table S2); Effect of riclin on

STZ-induced MIN6 cell damage (Figure S1); The intervention of mannan inhibited

the protective effect of Riclin on MIN6 cells (Figure S2).

**Table S1. Biochemical parameters of STZ-induced diabetic mice treated with riclin**

| Experimental groups | Control      | STZ        | STZ+LR       | STZ+HR       |
|---------------------|--------------|------------|--------------|--------------|
| HbA1c (mmol/L)      | 3.88±0.06**  | 8.33±0.27  | 7.20±0.27*   | 6.19±0.33**  |
| TRIG (nmol/L)       | 2.12±0.13**  | 3.22±0.15  | 2.61±0.10**  | 1.97±0.21**  |
| TCHO (nmol/L)       | 2.61±0.09**  | 4.51±0.39  | 3.52±0.18*   | 2.86±0.10**  |
| HDL-C (nmol/L)      | 2.23±0.12**  | 3.44±0.19  | 2.87±0.11*   | 2.22±0.10**  |
| LDL-C (nmol/L)      | 0.40±0.02**  | 0.74±0.07  | 0.50±0.04**  | 0.39±0.05**  |
| BUN (nmol/L)        | 10.22±0.35** | 12.29±0.30 | 10.95±0.19** | 10.12±0.20** |
| CREA (umol/L)       | 10.25±0.37** | 13.50±0.53 | 10.50±0.63** | 8.25±0.45**  |

The number of mice in each group is 12.

Values are means±S.E.M for the indicated number of mouse in each group (N).

\*P<0.05, \*\*P<0.01 compared with STZ group mice.

**Table S2. Primer sequences used in quantitative RT-PCR analysis**

| Gene                            | Primer Sequences                                                                      |
|---------------------------------|---------------------------------------------------------------------------------------|
| <i>Pdx1</i>                     | Forward: 5'- ACTTGAGCGTTCCAATACGC-3'<br>Reverse: 5'- AGAGGGGGAACGACTCTAGG-3'          |
| <i>MafA</i>                     | Forward: 5'- TTCAGCAAGGAGGAGGTCAT-3'<br>Reverse: 5'- CCGCCAACCTTCTCGTATTTTC-3'        |
| <i>Insulin</i>                  | Forward: 5'- GGAGCGTGGCTTCTTCTACA-3'<br>Reverse: 5'- GGTGGGCCTTAGTTGCAGTA-3'          |
| <i>Mcp-1</i>                    | Forward: 5'- GCTGGAGCATCCACGTGTT-3'<br>Reverse: 5'- ATCTTGCTGGTGAATGTGTAGCA-3'        |
| <i>Bcl-2</i>                    | Forward: 5'- GTCGCTACCGTCGTGACTTC-3'<br>Reverse: 5'- CAGACATGCACCTACCCAGC-3'          |
| <i>Bax</i>                      | Forward: 5'- CTGAGCTGACCTTGGAGC-3'<br>Reverse: 5'- GACTCCAGCCACAAAGATG-3'             |
| <i>Caspase-3</i>                | Forward: 5'- TGTCATCTCGCTCTGGTACG-3'<br>Reverse: 5'- AAATGACCCCTTCATCACCA-3'          |
| <i>IL-1<math>\beta</math></i>   | Forward: 5'- GAGCTTCAGGCAGGCAGTATC-3'<br>Reverse: 5'- GTATAGATTCTTTCCTTTGAGGC-3'      |
| <i>IFN-<math>\gamma</math></i>  | Forward: 5'- AGGAACTGGCAAAGGATGGTG-3'<br>Reverse: 5'- GTGCTGGCAGAATTATTCTTATTG-3'     |
| <i>IL-4</i>                     | Forward: 5'- TGACGCACAGAGCTATTGATGG-3'<br>Reverse: 5'- ATGATGCTCTTTAGGCTTTCCAG-3'     |
| <i>IL-10</i>                    | Forward: 5'- GAGGCTACGGCGCTGTCAT-3'<br>Reverse: 5'- CCACGGCCTTGCTCTTGTT-3'            |
| <i>IL-12</i>                    | Forward: 5'- ATGGCCATGTGGGAGCTGGAGAAAG-3'<br>Reverse: 5'- GTGGAGCAGCAGATGTGAGTGGCT-3' |
| <i>iNOs</i>                     | Forward: 5'- TGGTGAGGGGACTGGACTTT-3'<br>Reverse: 5'- CCAACTCTGCTGTTCTCCGT-3'          |
| <i>Arg-1</i>                    | Forward: 5'- CATGGGCAACCTGTGTCCTT-3'<br>Reverse: 5'- TCCTGGTACATCTGGGAACTTTC-3'       |
| <i><math>\beta</math>-actin</i> | Forward: 5'- TGCGTGACATCAAAGAGAAG-3'<br>Reverse: 5'- CGGATGTCAACGTCACACTT-3'          |

**Fig. S1**

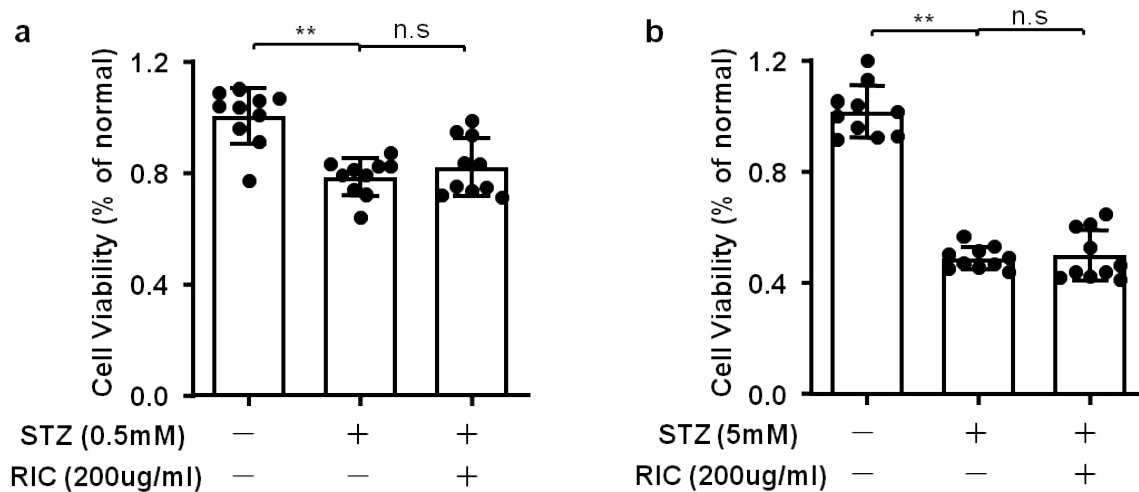

**Figure S1. Effect of riclin on STZ-induced MIN6 cell damage.** (a) MTT-based cytotoxicity assay of STZ (0.5mM) to MIN6 cell in the presence and absence of Riclin (200ug/ml). (b) MTT-based cytotoxicity assay of STZ (5mM) to MIN6 cell in the presence and absence of Riclin (200ug/ml). Data were shown as mean  $\pm$  SD, and were analyzed by one-way ANOVA. \* $p < 0.05$ , \*\* $p < 0.01$ , n.s: no significance.

**Fig. S2**

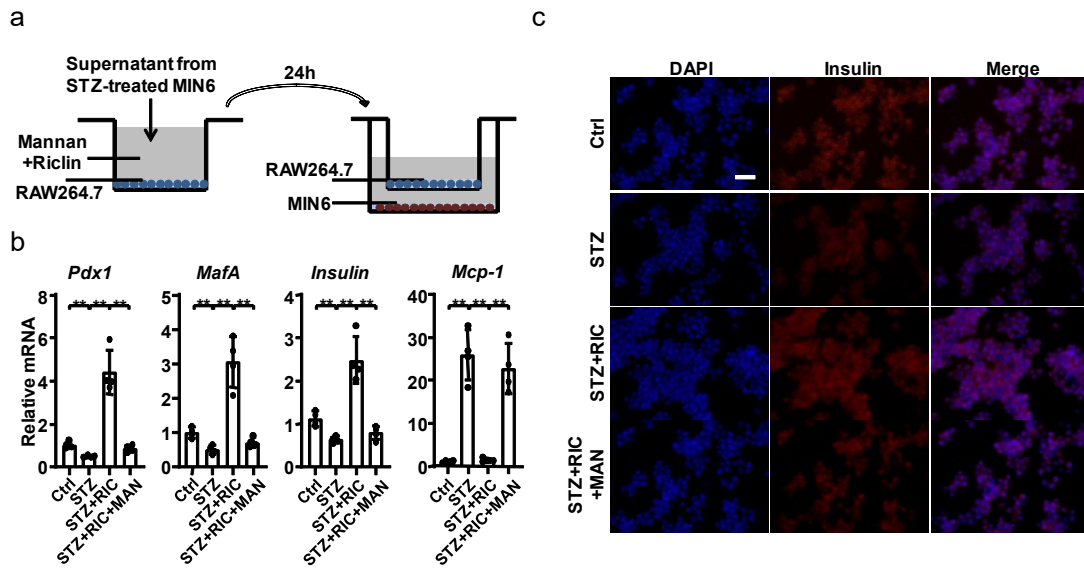

**Supplementary Figure 2. The intervention of mannan inhibited the protective effect of Riclin on MIN6 cells.** (a) Study design. (a)-(c) STZ+RIC group were treated with riclin (RIC) of 200 $\mu$ g/ml. STZ+RIC+MAN group were treated with mannan (MAN) of 50 $\mu$ g/ml and riclin of 200 $\mu$ g/ml. Ctrl group were not treated with STZ and RIC, while STZ group were treated with STZ and PBS. (b) The mRNA expression levels of *Pdx1*, *MafA*, *Insulin* and *Mcp-1*. (c) Expression level of insulin detected by immunofluorescence (scale bar: 20  $\mu$ m). Data were shown as mean  $\pm$  SD, and were analyzed by one-way ANOVA. \*\* $p$ <0.01.
